# Supplementary material for: Landslide and Wildfire Susceptibility Assessment in Southeast Asia Using Ensemble Machine Learning Methods
Source: MDPI journal article supplement (doi:10.3390/rs13081572), 2021-04-18
Supplement: s1 [file s1]

# Supplementary Material

## The relationship between conditioning factors and hazards

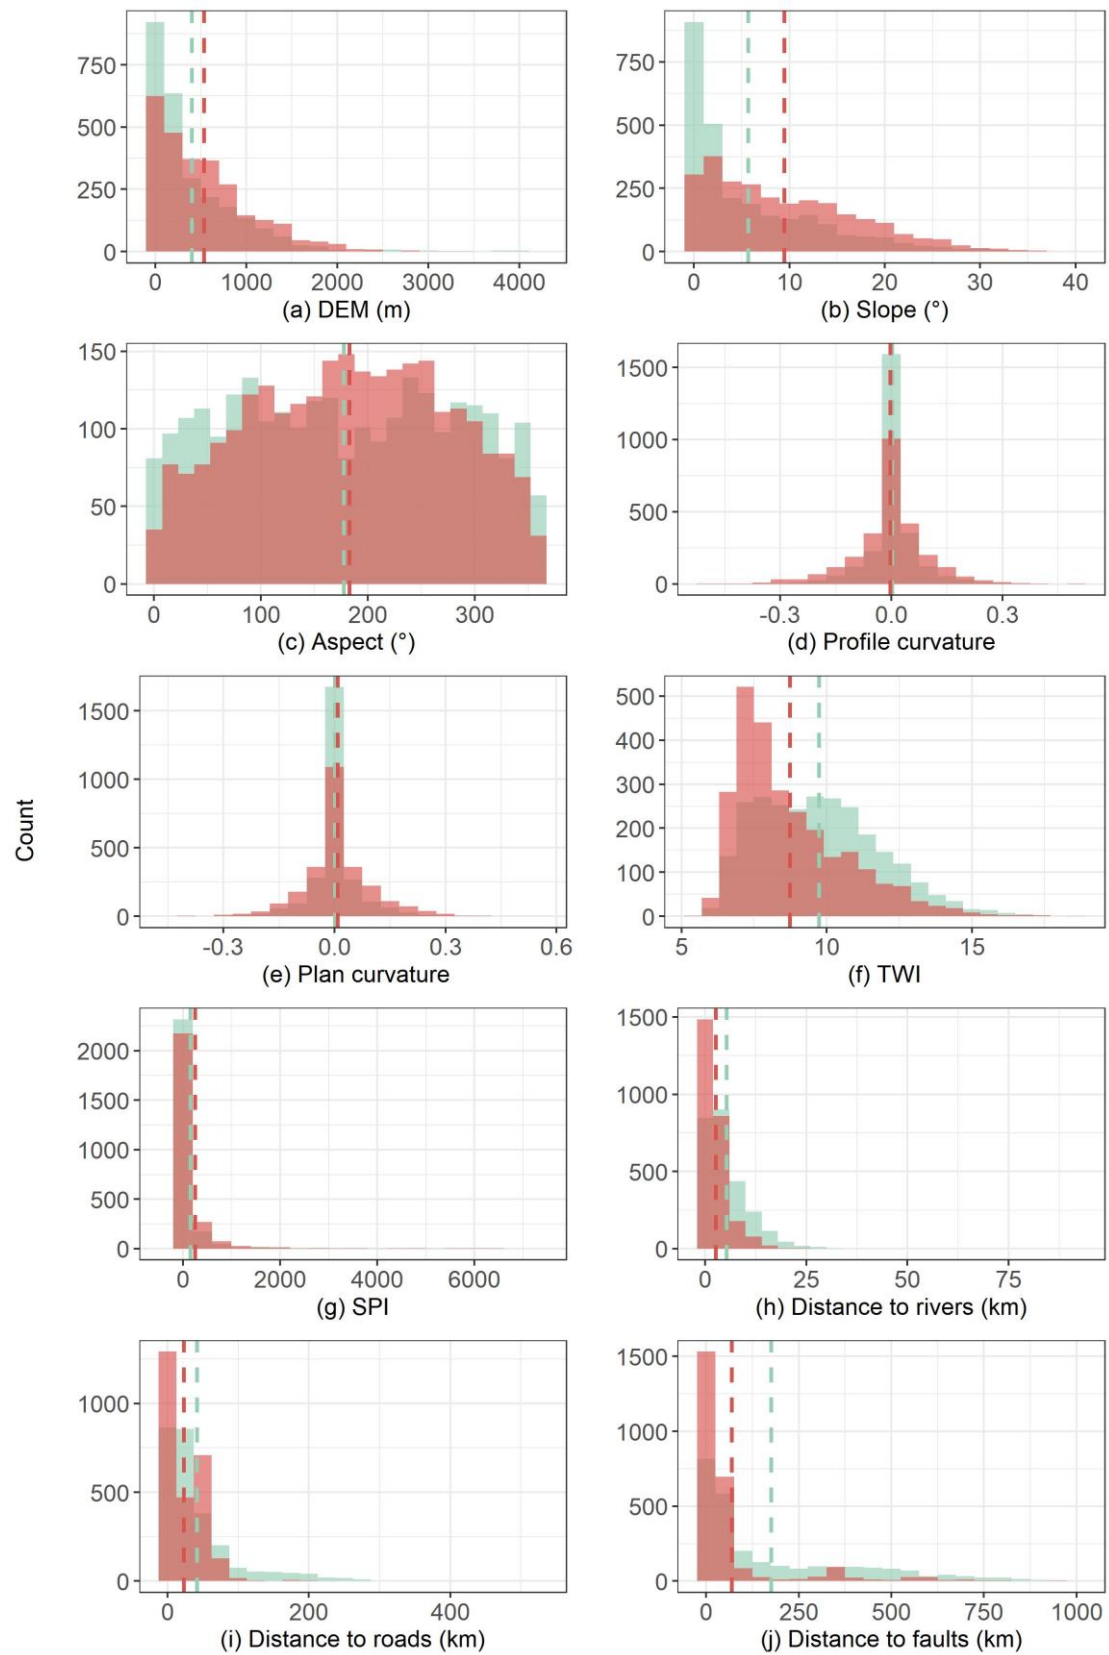

Fig. S1 The relationship between conditioning factors and landslide

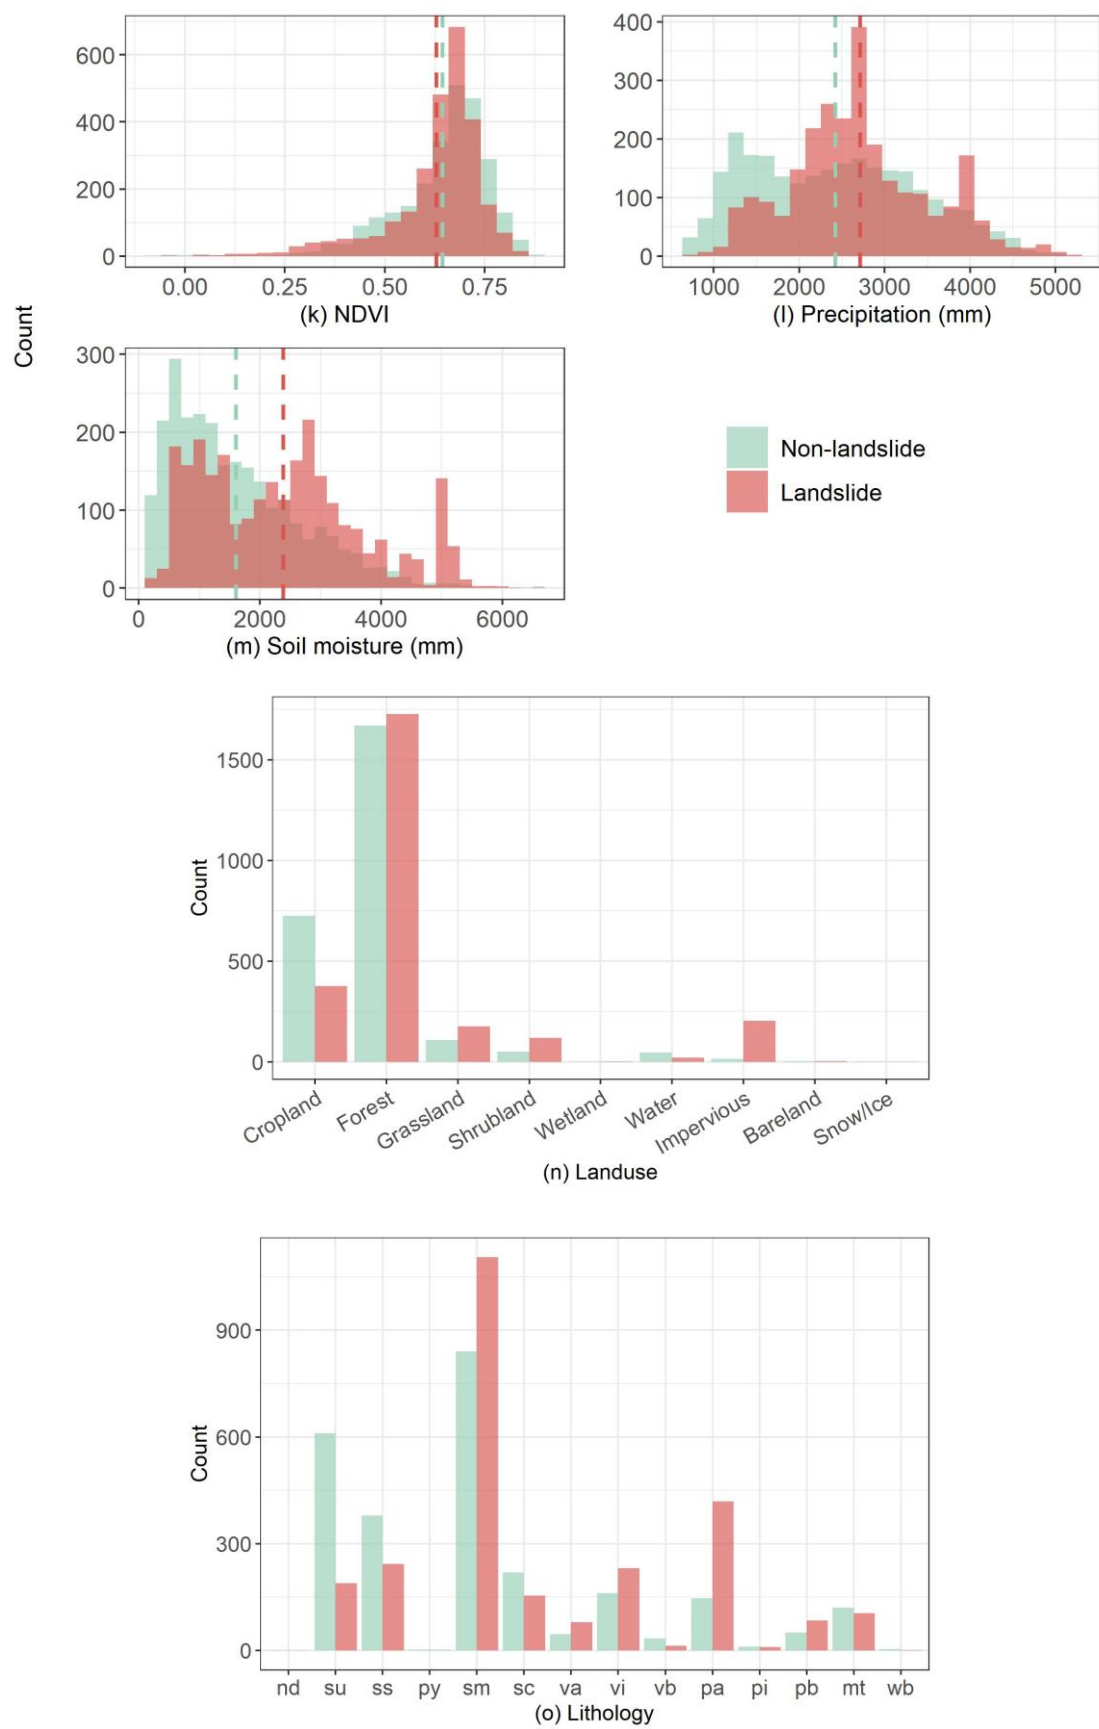

Fig. S1 (Continue)

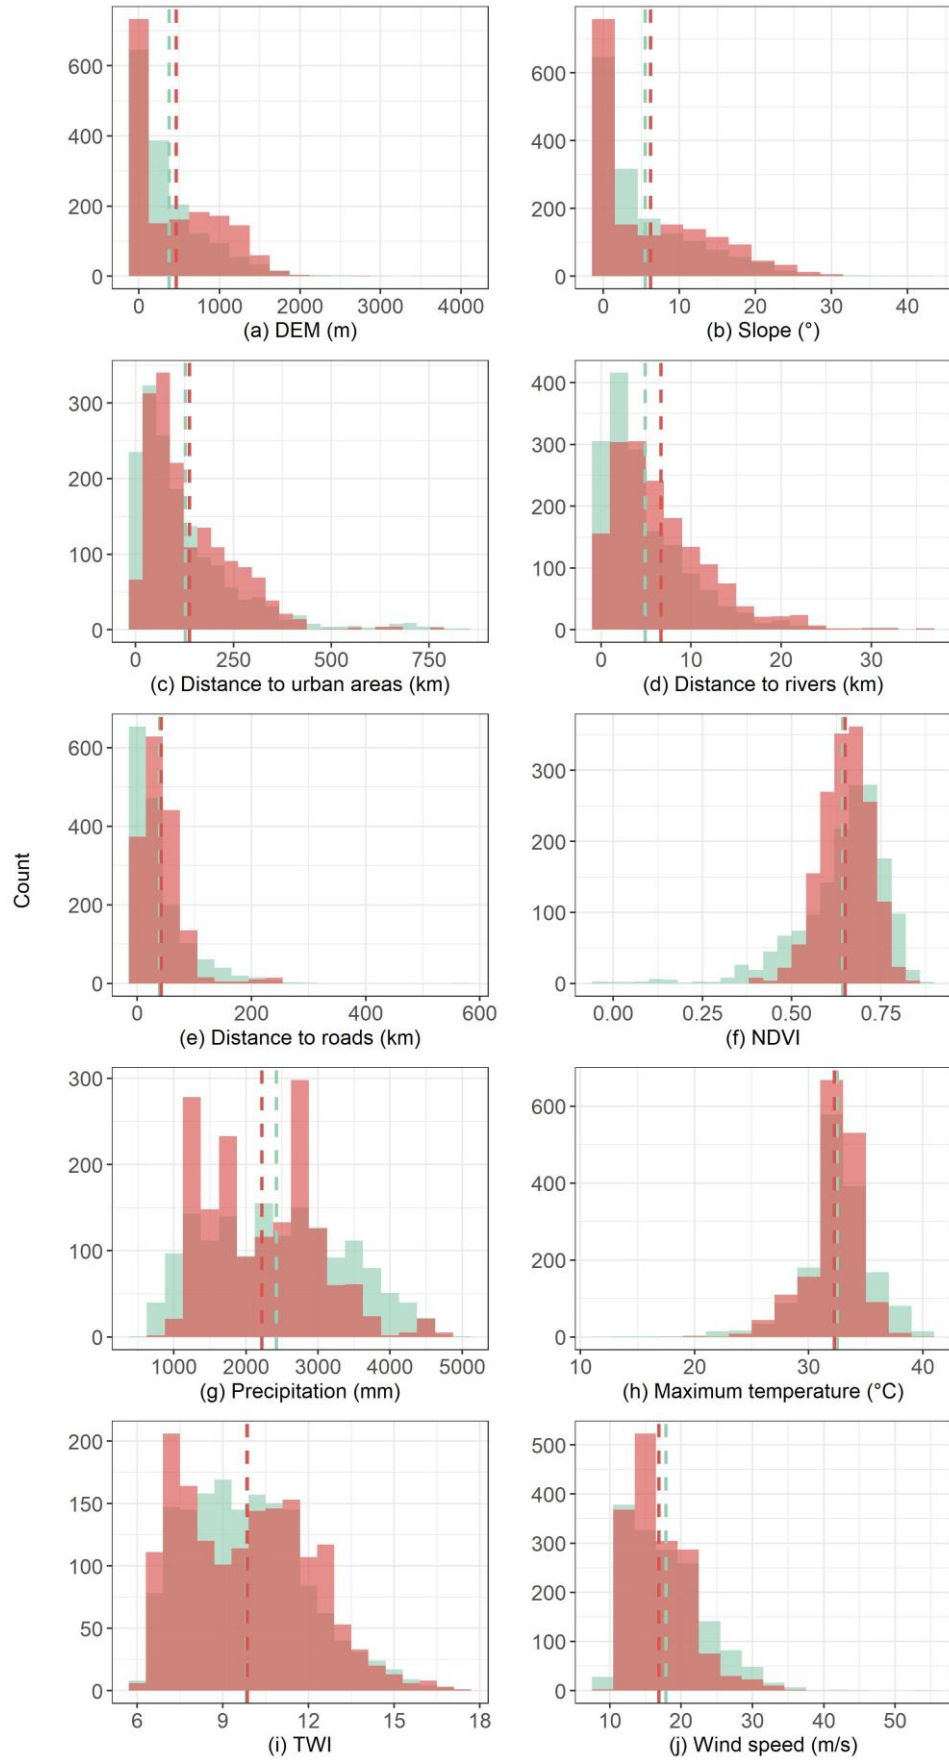

Fig. S2 The relationship between conditioning factors and wildfire

### **Multicollinearity analysis of the conditioning factors**

Table S1 Multicollinearity analysis of landslide conditioning factors

| Conditioning factors      | TOL   | VIF   |
|---------------------------|-------|-------|
| Elevation                 | 0.579 | 1.726 |
| Slope                     | 0.367 | 2.728 |
| Aspect                    | 0.993 | 1.007 |
| Profile curvature         | 0.647 | 1.546 |
| Plan curvature            | 0.627 | 1.596 |
| Distance to rivers        | 0.876 | 1.142 |
| Distance to roads         | 0.847 | 1.181 |
| Distance to faults        | 0.773 | 1.294 |
| Lithology                 | 0.858 | 1.165 |
| Land use                  | 0.823 | 1.216 |
| NDVI                      | 0.71  | 1.408 |
| TWI                       | 0.369 | 2.711 |
| SPI                       | 0.829 | 1.207 |
| Soil moisture             | 0.811 | 1.233 |
| Mean annual precipitation | 0.817 | 1.224 |

Table S2 Multicollinearity analysis of wildfire conditioning factors

| Conditioning factors            | TOL   | VIF   |
|---------------------------------|-------|-------|
| Elevation                       | 0.190 | 5.269 |
| Slope                           | 0.360 | 2.776 |
| Distance to urban areas         | 0.816 | 1.225 |
| Distance to rivers              | 0.934 | 1.071 |
| Distance to roads               | 0.817 | 1.223 |
| NDVI                            | 0.781 | 1.281 |
| Mean annual precipitation       | 0.485 | 2.062 |
| Mean annual maximum temperature | 0.253 | 3.956 |
| TWI                             | 0.430 | 2.327 |
| Mean annual windspeed           | 0.855 | 1.170 |

## ROC (the receiver operating characteristic) curves for AdaBoost, GBDT, and RF

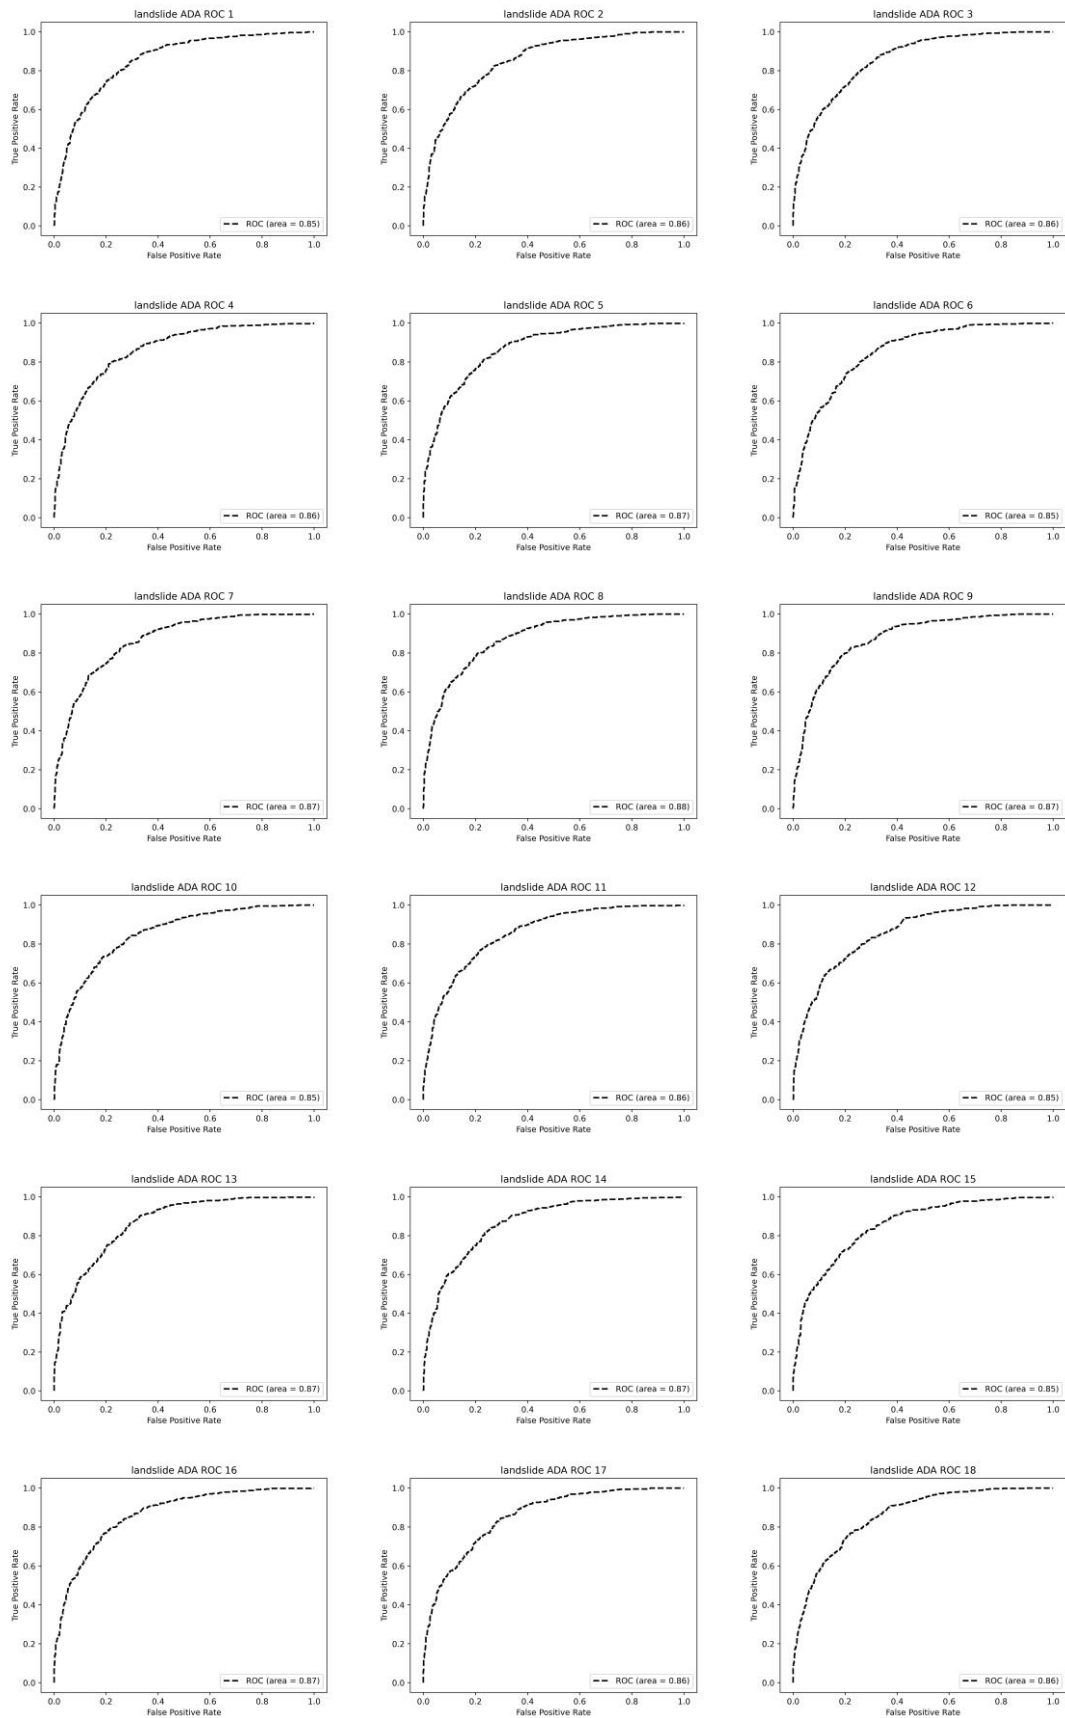

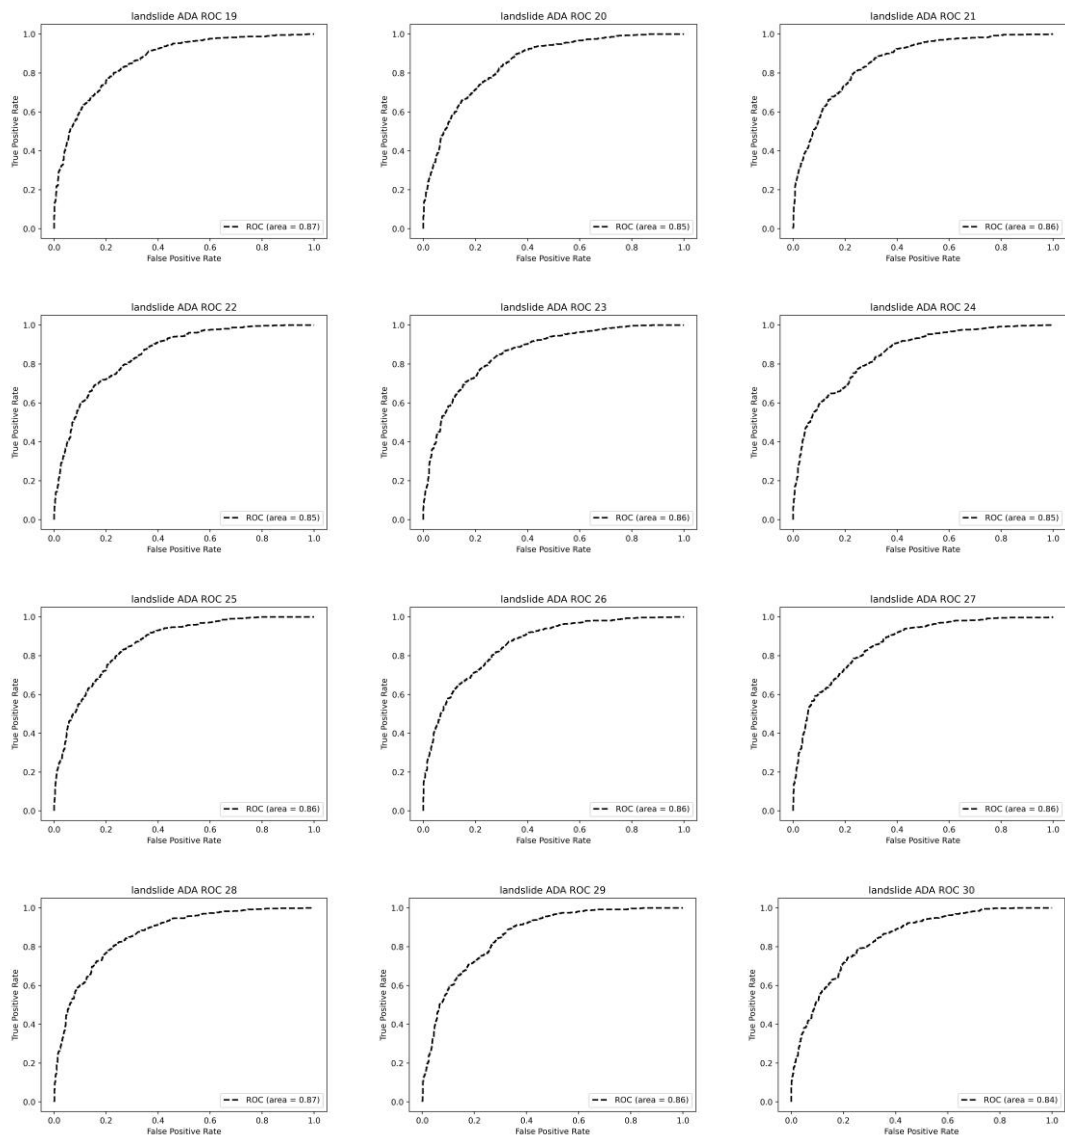

Fig.S 3 ROC curves for landslide susceptibility using AdaBoost

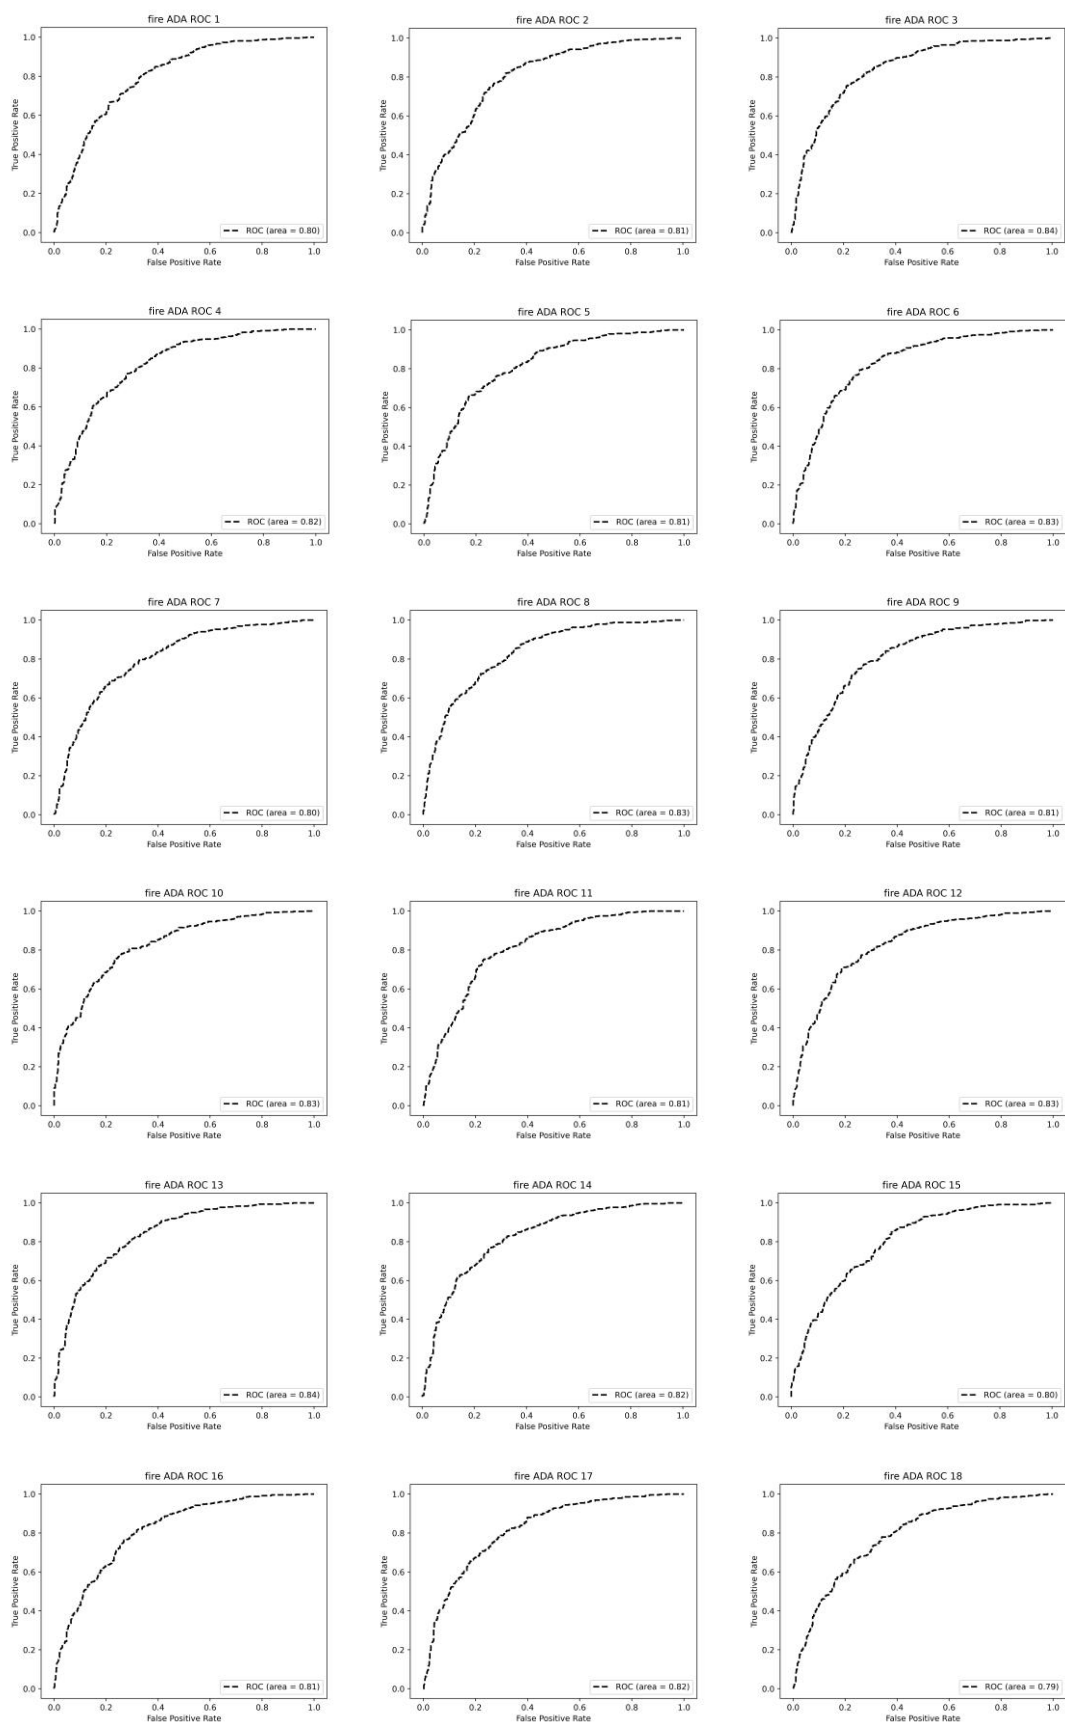



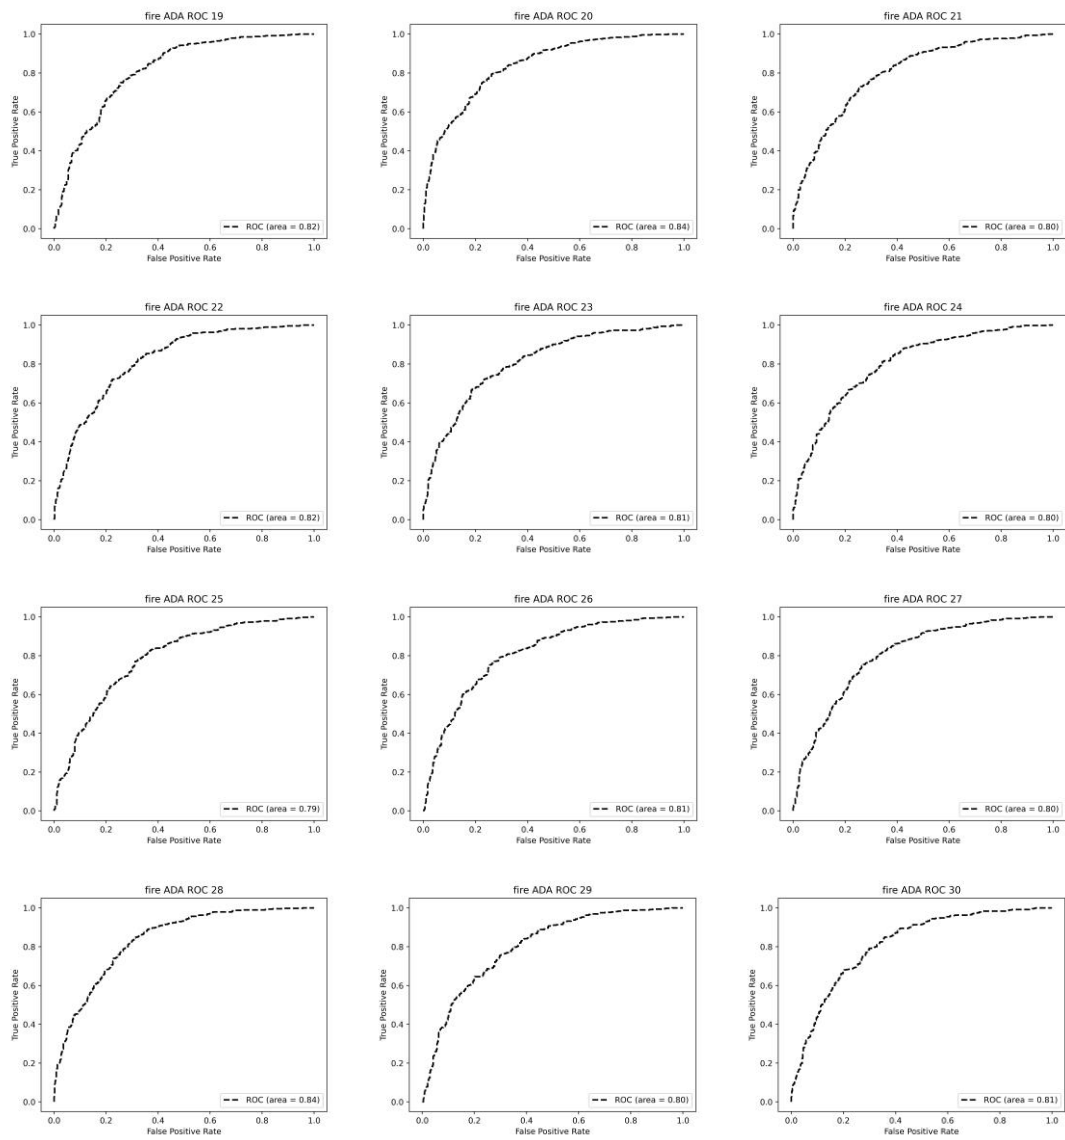

Fig.S 4 ROC curves for wildfire susceptibility using AdaBoost

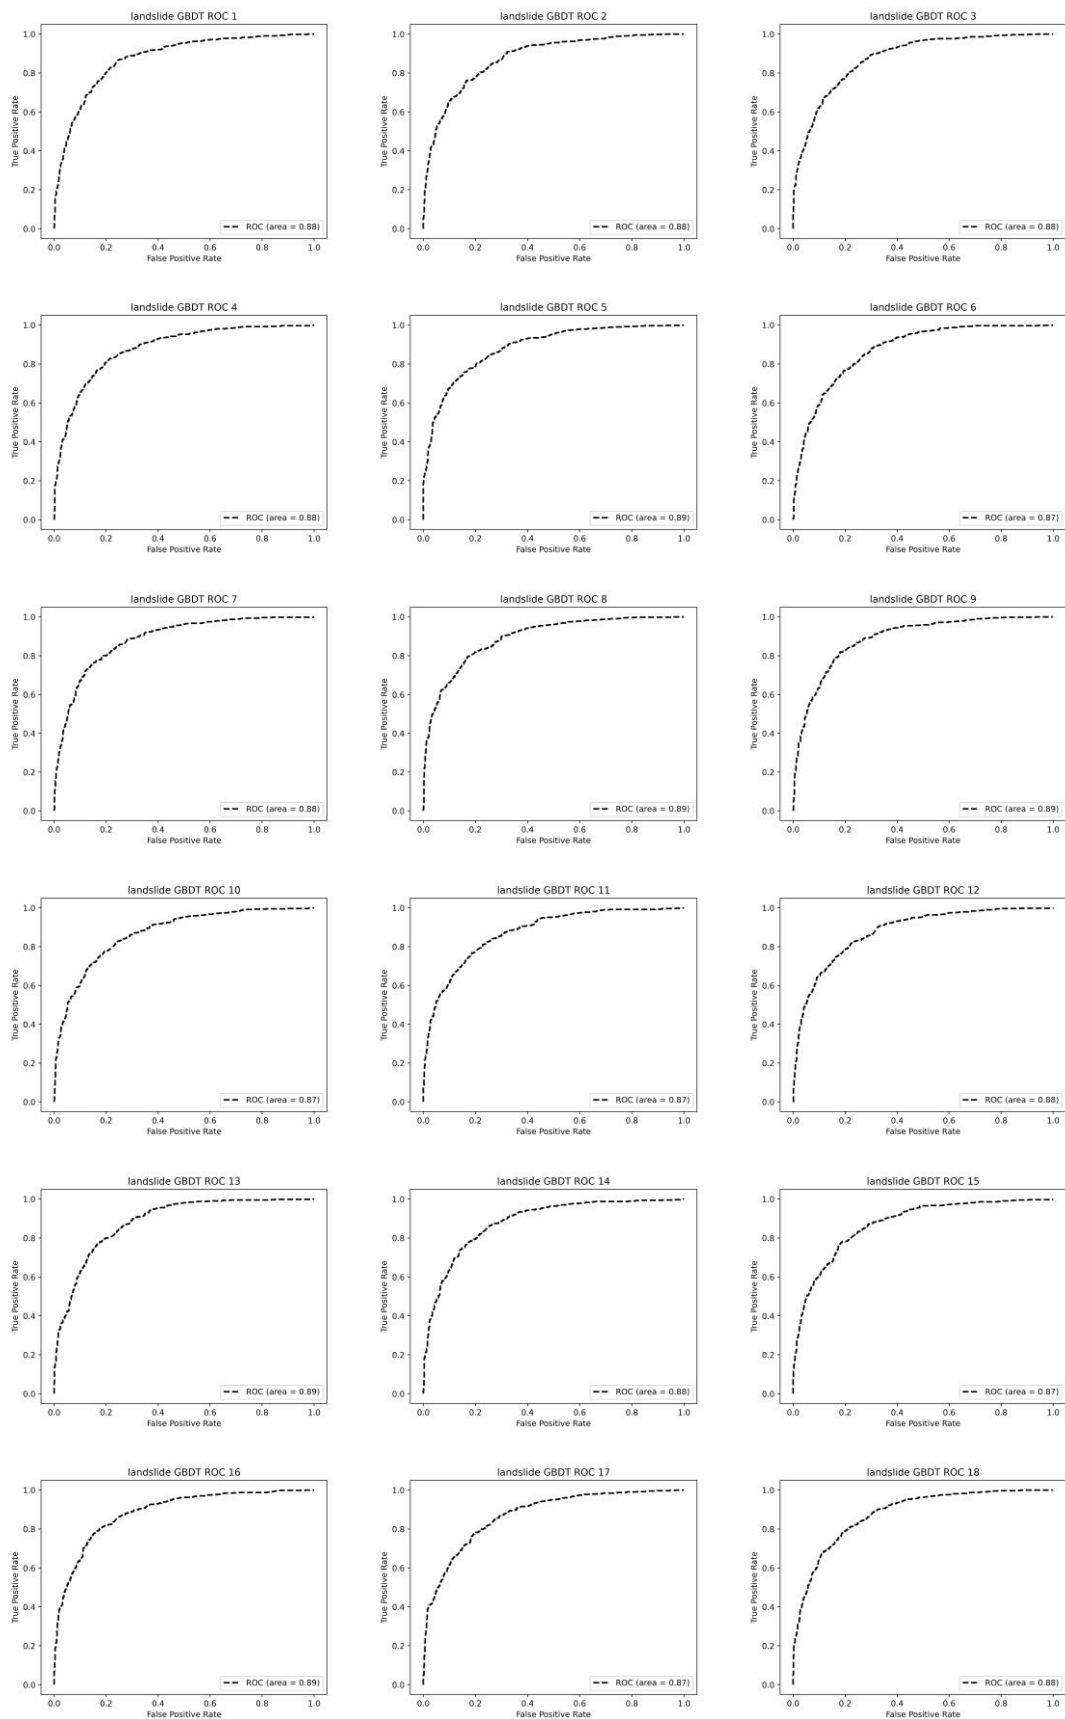

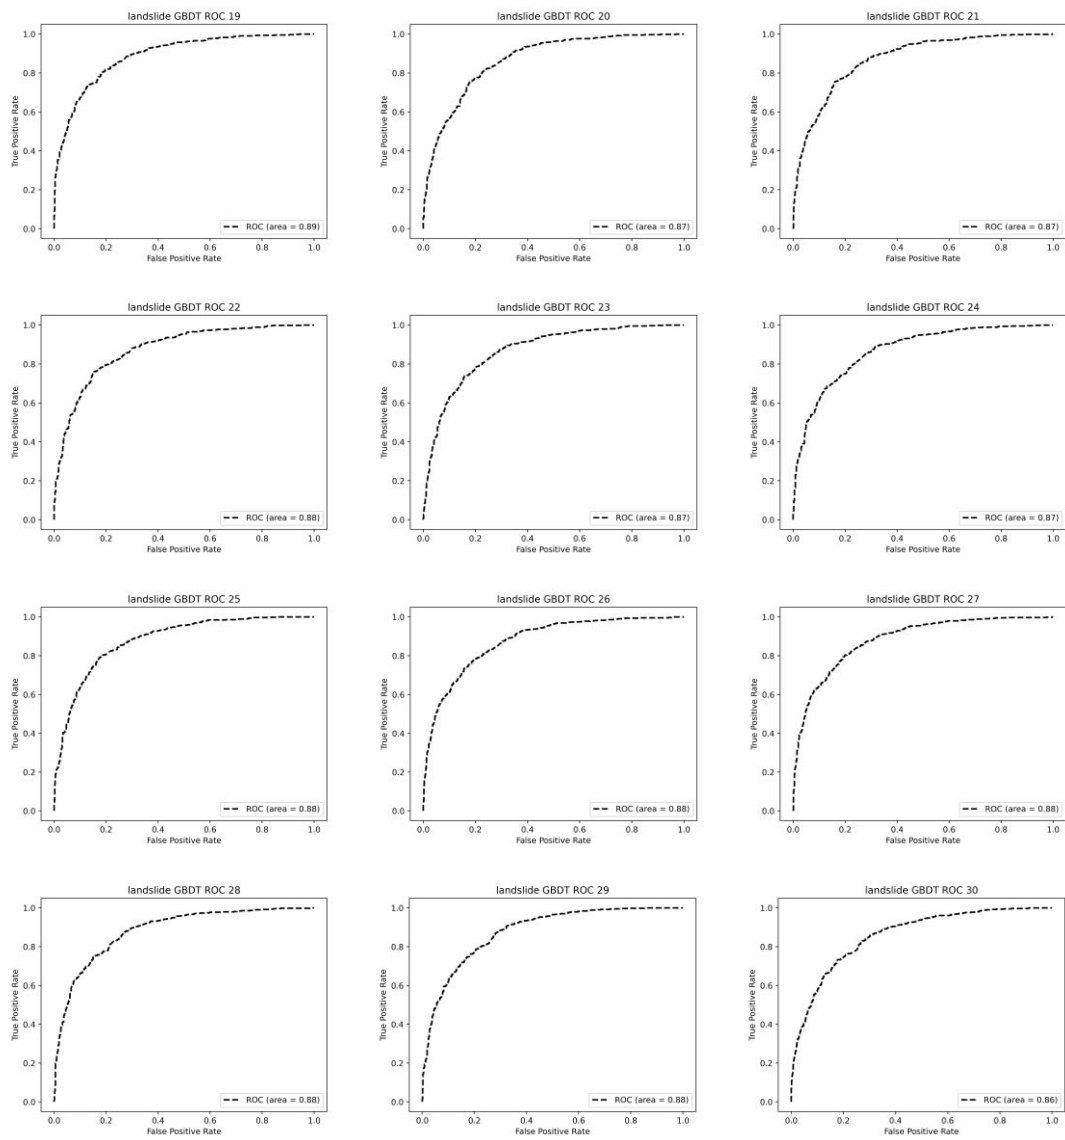

Fig.S 5 ROC curves for landslide susceptibility using GBDT

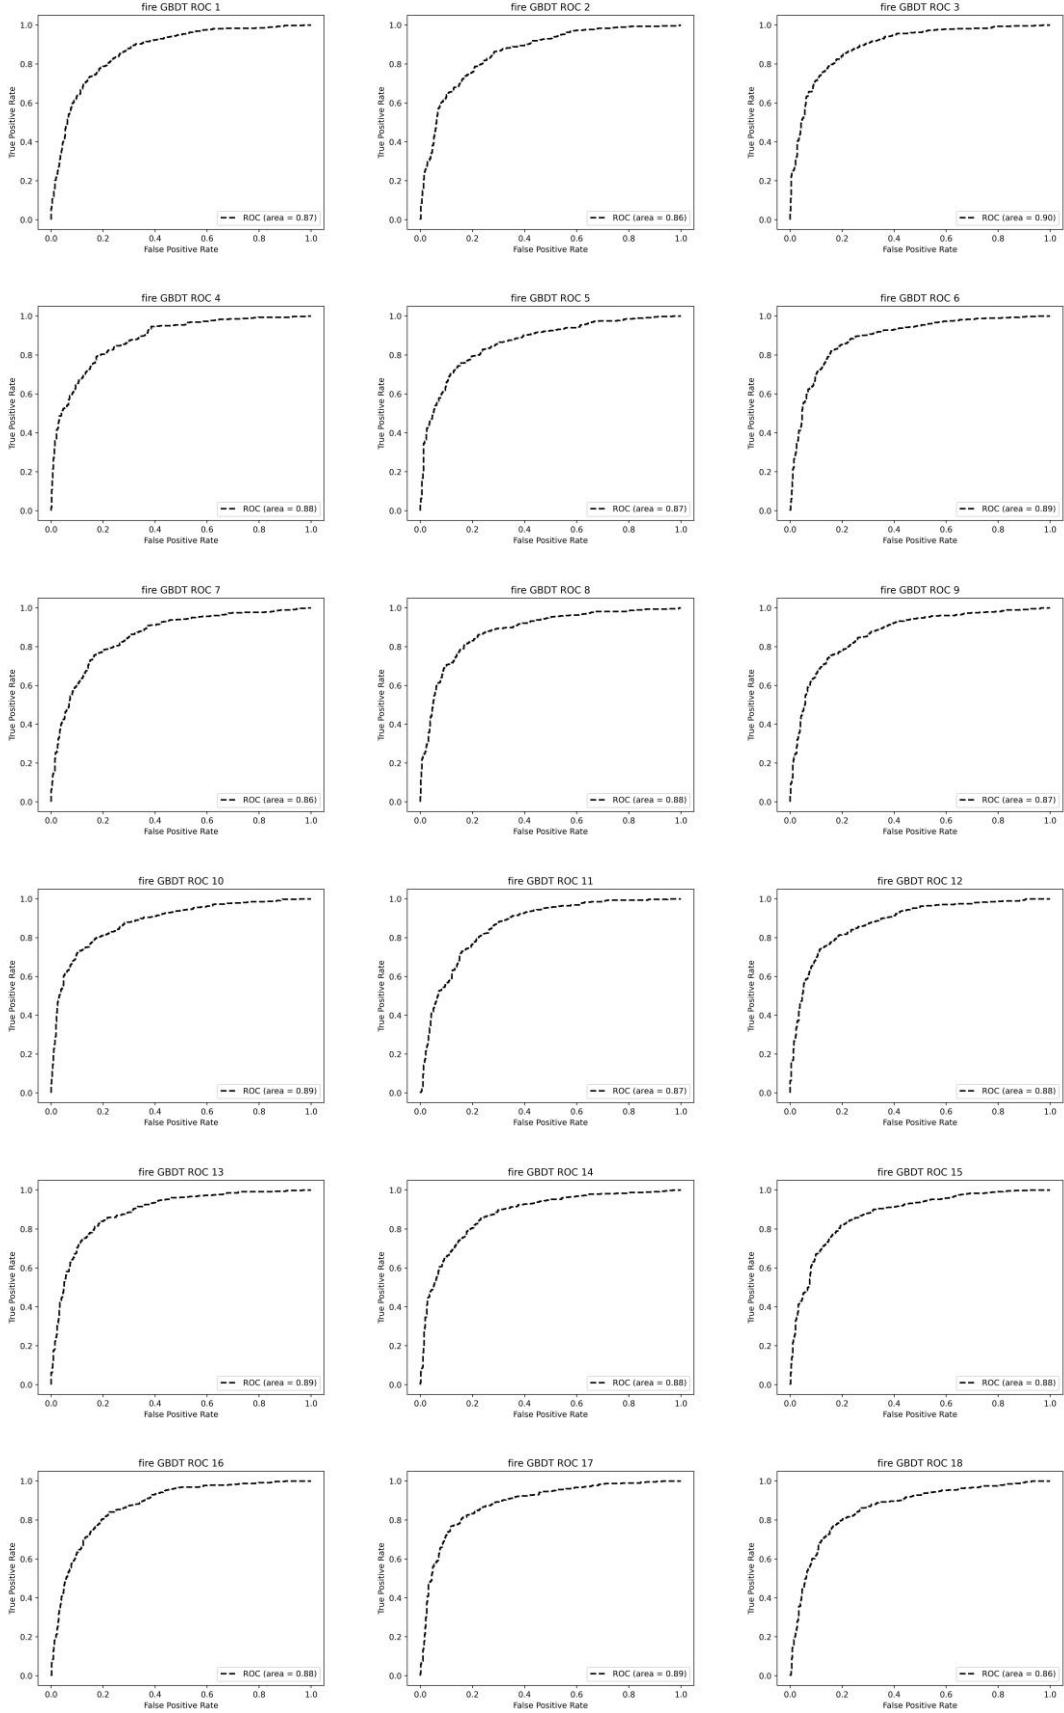

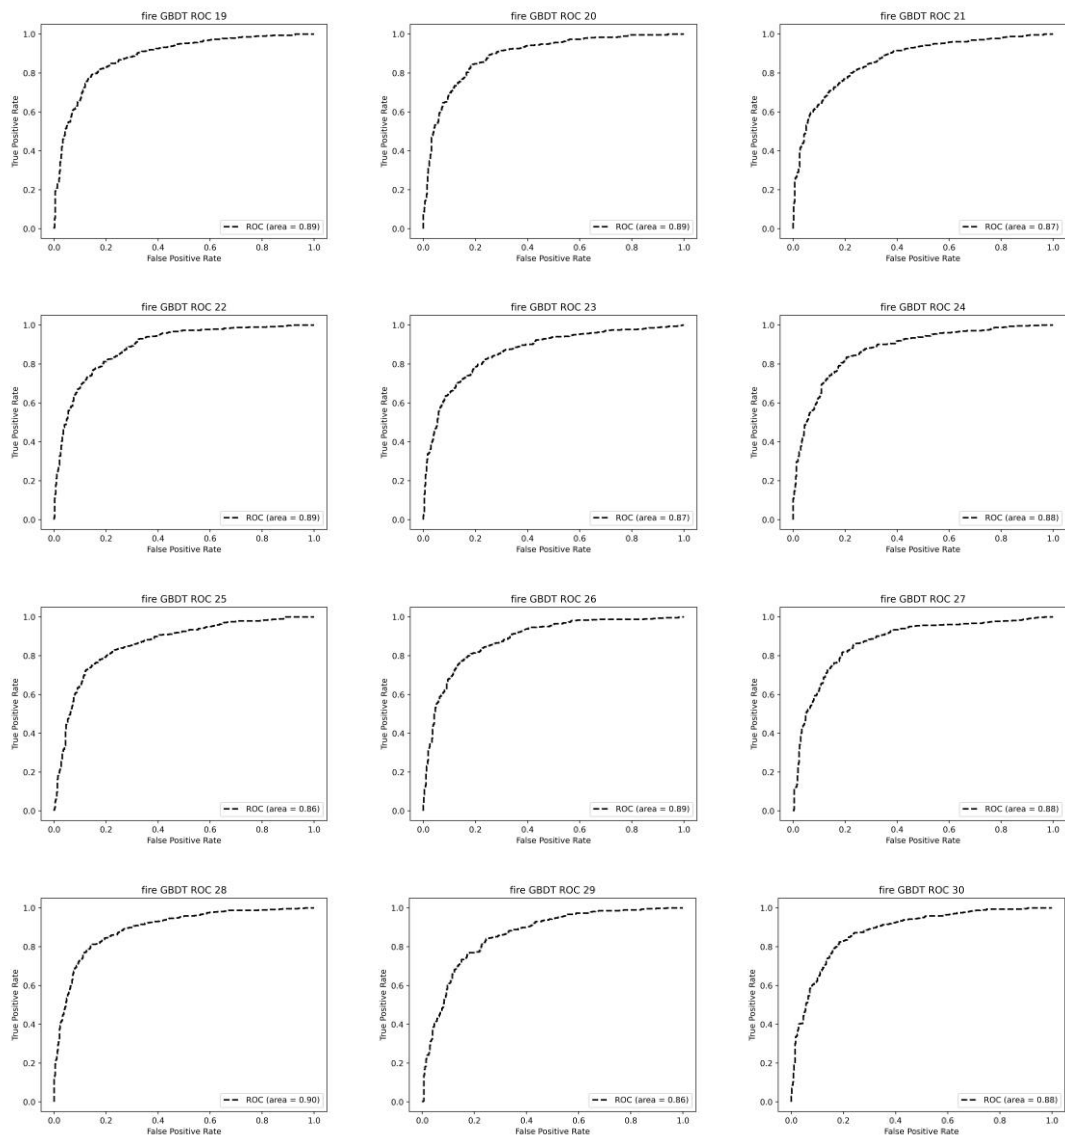

Fig.S 6 ROC curves for wildfire susceptibility using GBDT

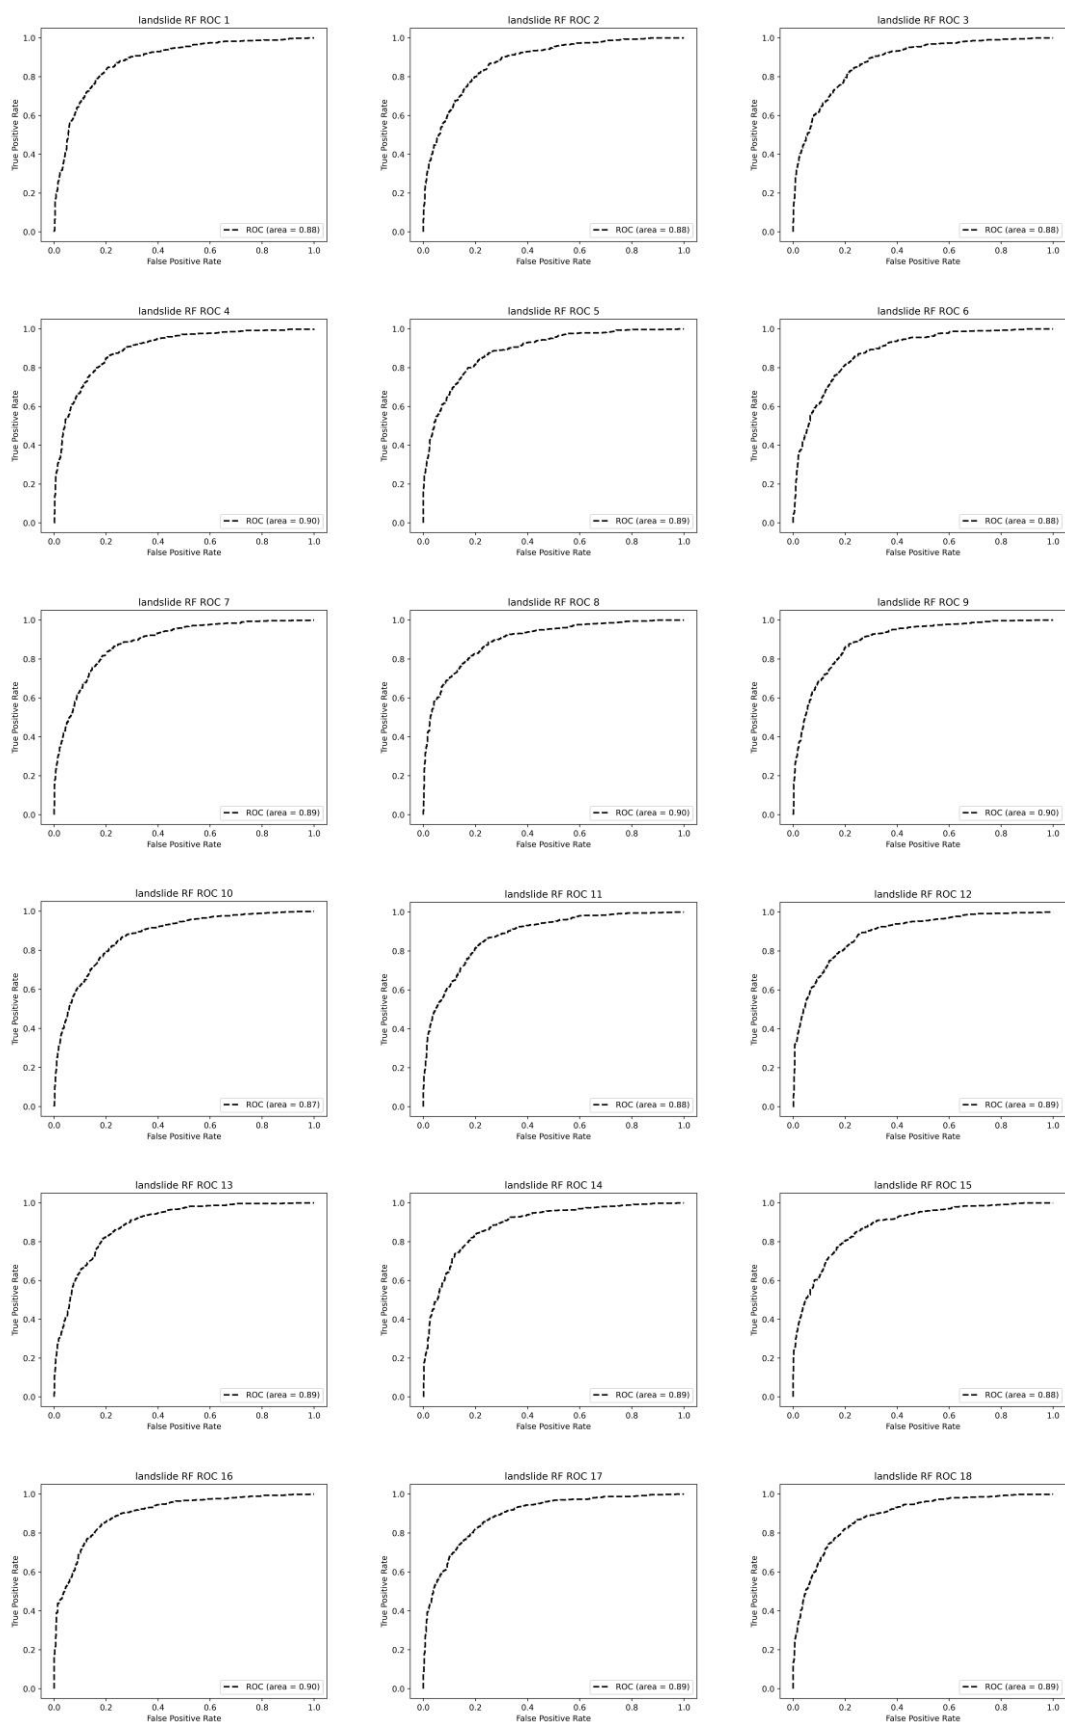

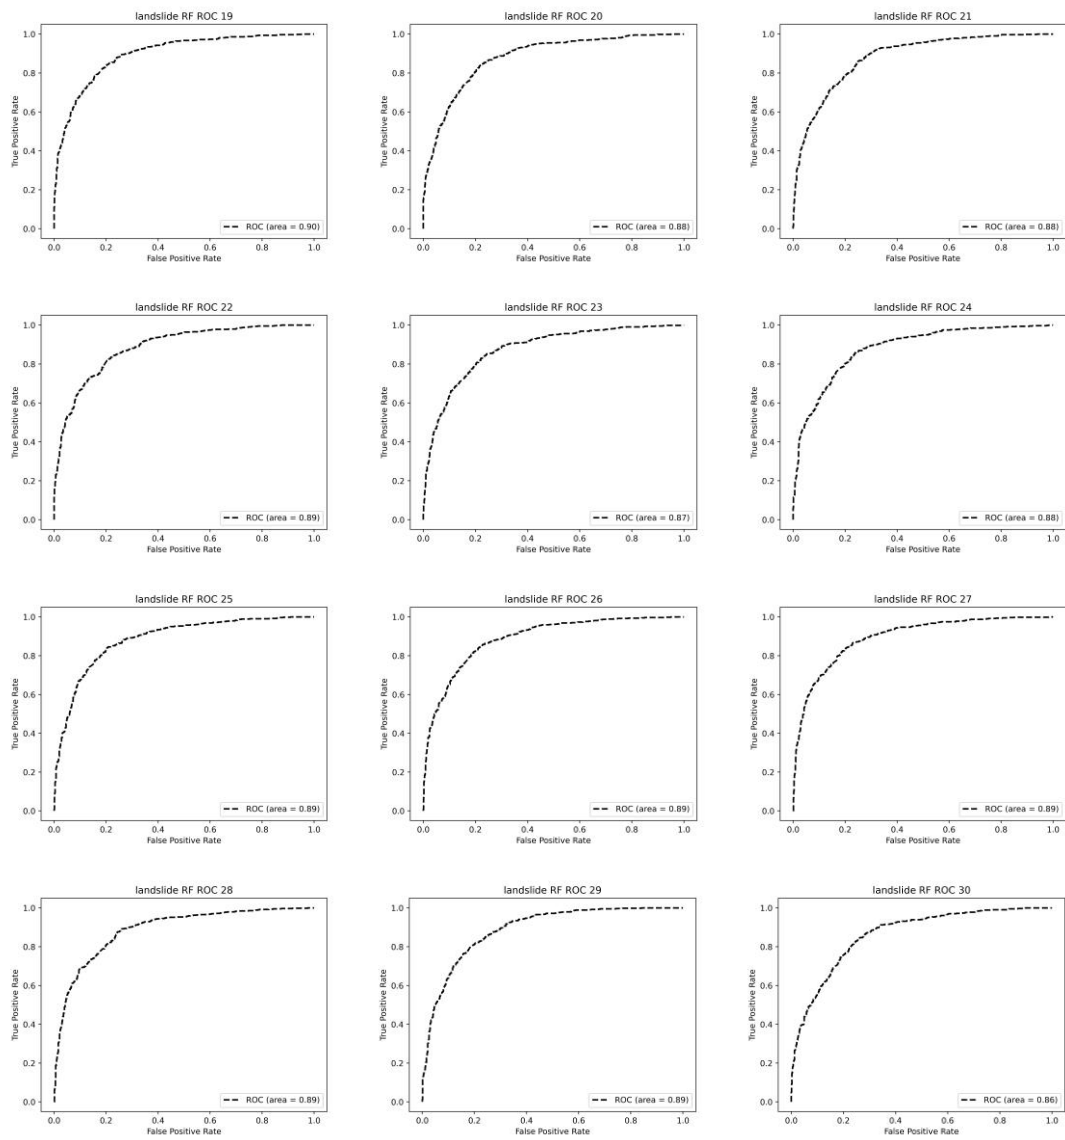

Fig.S 7 ROC curves for landslide susceptibility using RF

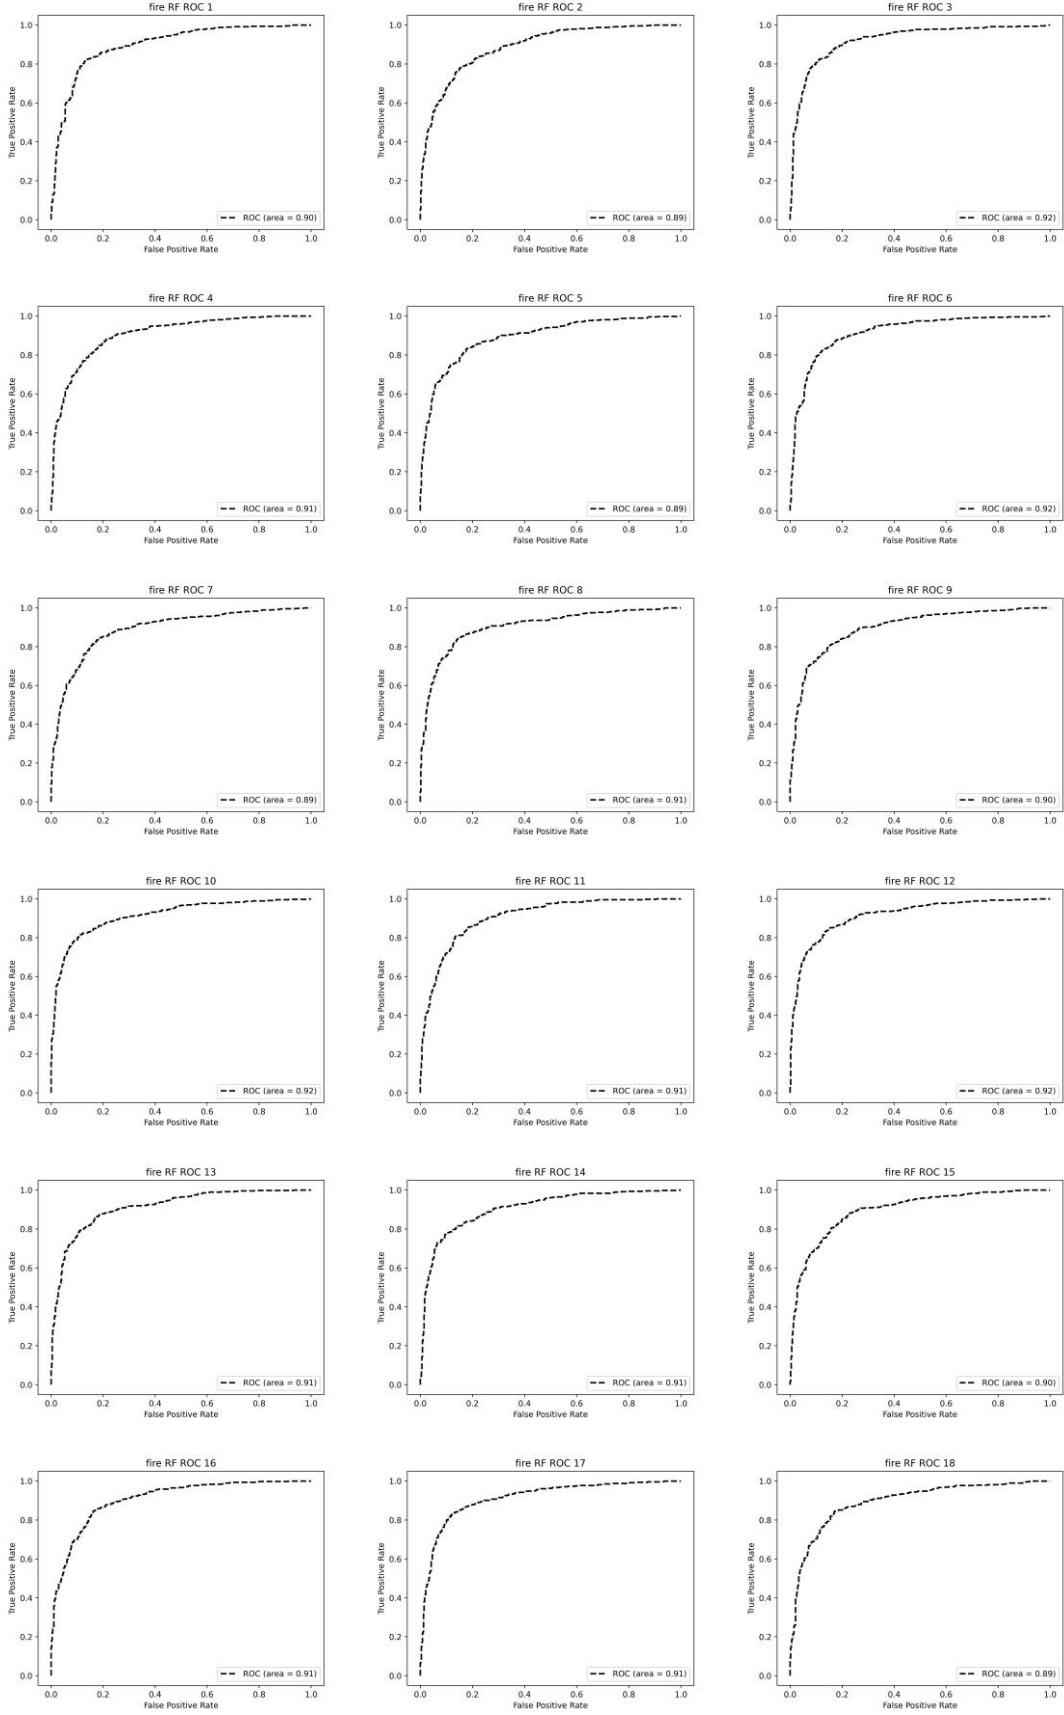



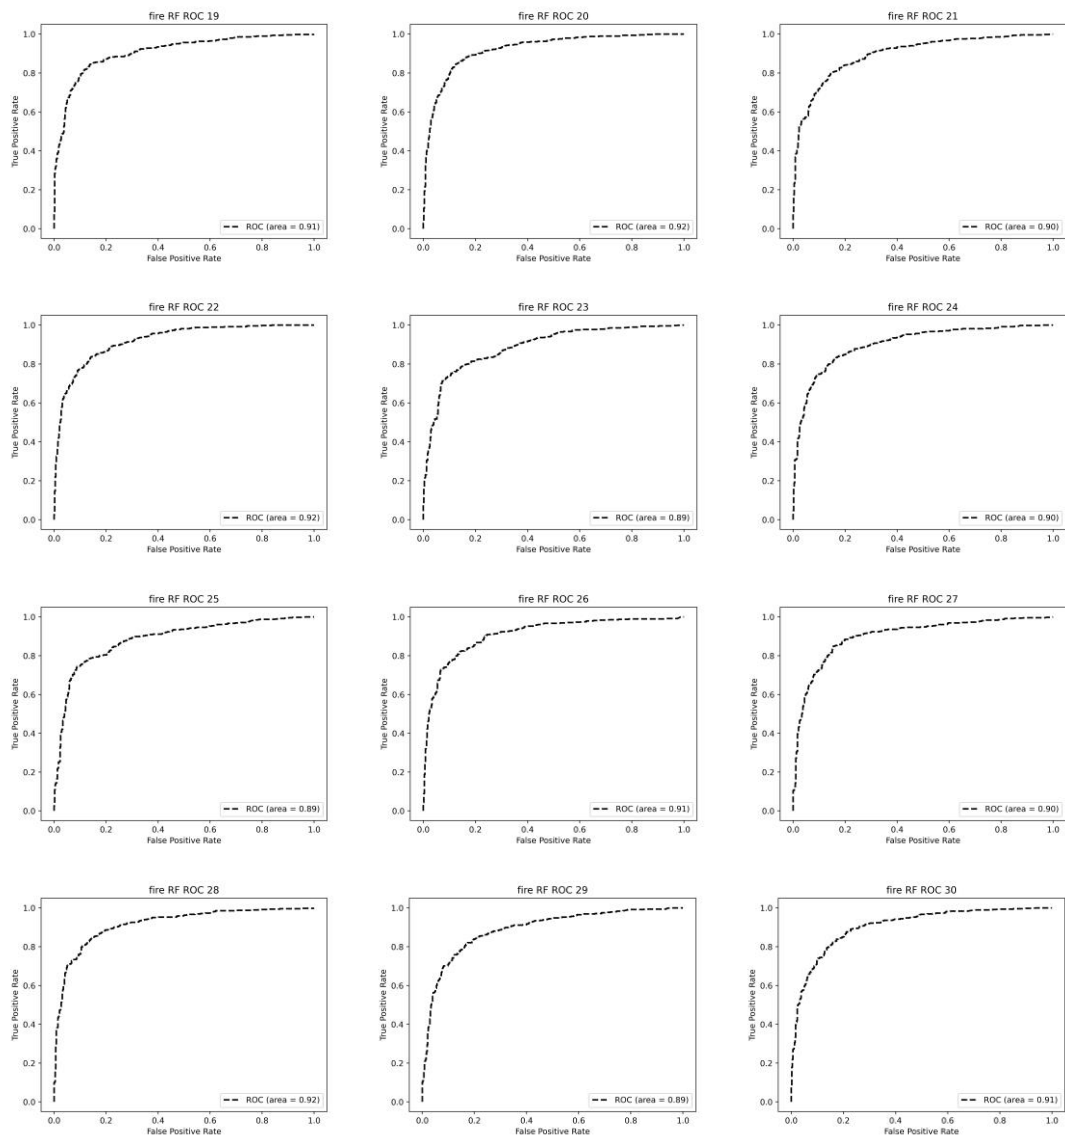

Fig.S 8 ROC curves for wildfire susceptibility using RF
